# Supplementary material
Source: PubMed Central journal article supplement (PMC7101146)
Supplement: jciinsight-5-135119-s118.pdf [file jciinsight-5-135119-s118.pdf]

## Supplementary Tables

**Supplementary Table S1. Clinical features of patients in Family A.**

| <b>Patient ID</b>                   | III:1                                                                                           | III:3                                                                                           | III:5                                                                         |
|-------------------------------------|-------------------------------------------------------------------------------------------------|-------------------------------------------------------------------------------------------------|-------------------------------------------------------------------------------|
| Sex                                 | Female                                                                                          | Male                                                                                            | Male                                                                          |
| Age at onset (years)                | 72                                                                                              | 69                                                                                              | 57                                                                            |
| Age at first exam (years)           | 79                                                                                              | 73                                                                                              | 64                                                                            |
| Disease duration (years)            | 10                                                                                              | 13                                                                                              | 10                                                                            |
| Age of death                        | 82                                                                                              | 82                                                                                              | 67                                                                            |
| Cause of death                      | Pneumonia                                                                                       | Asphyxia caused by foreign body aspiration                                                      | Unknown                                                                       |
| <b>Clinical features</b>            |                                                                                                 |                                                                                                 |                                                                               |
| Initial symptoms                    | episodic memory loss                                                                            | episodic memory loss                                                                            | episodic memory loss                                                          |
| Orientation dysfunction             | Yes                                                                                             | Yes                                                                                             | Yes                                                                           |
| Language problems                   | Yes                                                                                             | Yes                                                                                             | Yes                                                                           |
| Changes in personality and behavior | Social withdrawal/distrust in others/Irritability and aggressiveness/Changes in sleeping habits | Social withdrawal/distrust in others/Irritability and aggressiveness/Changes in sleeping habits | Distrust in others/Irritability and aggressiveness/Changes in sleeping habits |
| Executive disfunction               | Yes                                                                                             | Yes                                                                                             | Yes                                                                           |
| <b>Neurological examination</b>     |                                                                                                 |                                                                                                 |                                                                               |
| Muscle strength                     | Normal                                                                                          | Normal                                                                                          | Normal                                                                        |
| Muscle tone                         | Normal                                                                                          | Normal                                                                                          | Normal                                                                        |
| Tremor                              | -                                                                                               | -                                                                                               | -                                                                             |
| Tendon reflexe                      | ++                                                                                              | ++                                                                                              | ++                                                                            |
| Babinski's sign                     | -                                                                                               | -                                                                                               | -                                                                             |

**Neuropsychological tests**

|                         |       |       |              |
|-------------------------|-------|-------|--------------|
| MMSE (first evaluation) | 17/30 | 19/30 | 6/30         |
| MoCA (first evaluation) | 10/30 | 12/30 | Can't finish |

**Other examinations**

|                   |        |                                                                           |                                        |
|-------------------|--------|---------------------------------------------------------------------------|----------------------------------------|
| Blood pressure    | Normal | Normal                                                                    | Normal                                 |
| Thyroid hormones  | N/A    | Normal                                                                    | Normal                                 |
| VitB12            | N/A    | Normal                                                                    | Normal                                 |
| TPHA and RPR test | N/A    | -                                                                         | -                                      |
| Brain MRI         | N/A    | Atrophy in widespread cortex and hippocampus                              | Lacunar stroke and whole brain atrophy |
| FDG-PET           | N/A    | Hypometabolic activity in temporoparietal, frontal and occipital cortices | N/A                                    |
| PiB-PET           | N/A    | Increased 11C-Pittsburgh compound B (PiB) accumulation                    | N/A                                    |
| Autopsy           | N/A    | Senile Plaque (+) ; Neurofibrillary Tangle (+)                            | N/A                                    |

---

TPHA:a passive particle agglutination assay for the qualitative and semi-quantitative detection of IgG and IgM antibodies to Treponema pallidum.

RPR:rapid plasma regain test;

N/A: not available

**Supplementary Table S2. Clinical features of controls in Family A.**

| ID     | Year of Birth | Age of last examination | Muscle strength | Muscle tone | Tremor | Tendon reflexe | Babinski's sign | Years of education | MMSE | MoCA |
|--------|---------------|-------------------------|-----------------|-------------|--------|----------------|-----------------|--------------------|------|------|
| III:2  | 1930          | 83                      | N               | N           | -      | -              | -               | < 6 years          | 22   | 17   |
| III:4  | 1942          | 70                      | N               | N           | -      | -              | -               | < 6 years          | 22   | 18   |
| III:6  | 1952          | 61                      | N               | N           | -      | -              | -               | < 6 years          | 24   | 20   |
| III:7  | 1939          | 73                      | N               | N           | -      | -              | -               | < 6 years          | 21   | 19   |
| III:8  | 1942          | 70                      | N               | N           | -      | -              | -               | < 6 years          | 22   | 17   |
| III:9  | 1944          | 68                      | N               | N           | -      | -              | -               | < 6 years          | 25   | 18   |
| III:10 | 1946          | 66                      | N               | N           | -      | -              | -               | < 6 years          | 24   | 21   |
| III:11 | 1948          | 64                      | N               | N           | -      | -              | -               | 9 years            | 26   | 24   |
| III:12 | 1940          | 72                      | N               | N           | -      | -              | -               | < 6 years          | 21   | 19   |
| III:13 | 1942          | 70                      | N               | N           | -      | -              | -               | < 6 years          | 22   | 18   |
| III:14 | 1958          | 61                      | N               | N           | -      | -              | -               | 9 years            | 30   | 27   |

N=normal; “-”= absent

MMSE: Chineses version of Mini-Mental State Examination. The cut-off points were 16/17 for illiterate individuals, 19/20 for individuals with 1-6 years of education, and 23/24 for individuals with 7 or more years of education. MoCA: Montreal Cognitive Assesment Beijing Version. The cut-off scores for AD screening were 13 for individuals with no more than 6 years of education, 15 for individuals with 7 to 12 years of education, and 16 for individuals with more than 12 years of education.

**Supplementary Table S3. Filtering of the candidate genes for Family A by whole-exome sequencing.**

| <b>Filter</b>                                                                              | <b>III:1</b> | <b>III:3</b> | <b>III:5</b> | <b>III:2</b> |
|--------------------------------------------------------------------------------------------|--------------|--------------|--------------|--------------|
| Status                                                                                     | Patient      | Patient      | Patient      | Control      |
| Total number of variants                                                                   | 108081       | 113406       | 112478       | 107568       |
| Number of NS/SS/Indel <sup>1</sup>                                                         | 13889        | 15280        | 15088        | 15070        |
| Number of rare NS/SS/Indel variants <sup>2</sup>                                           | 2262         | 2261         | 2103         | 2073         |
| Shared NS/SS/Indel variants in 3 cases                                                     |              |              | 54 variants  |              |
| Number of variants presented in cases but not in unaffected <sup>3</sup>                   |              |              | 20 variants  |              |
| Number of variants after removing non-dementia associated genes <sup>4</sup>               |              |              | 16 SNV       |              |
| Number of variants after removing variants not segregated with disease status <sup>5</sup> |              |              | 3 SNV        |              |

1. NS/SS/Indel, non-synonymous/splice acceptor and donor site/insertions or deletions variants;

2. Based on the hypothesis that the mutation underlying Family A with dementia should not be common in the general population, we removed the NS/SS/Indel variants with MAF > 0.5% in the Genome Aggregation Database (gnomAD), ExAc Database, the 1000 Genome Project, the eight previously exome-sequenced HapMap samples ('HapMap 8'), the BGI in-house exome variant dataset, and the PVFD database (Population variation frequency database), which are based on the Chinese population. BGI In-house database: sequence data from 1000 controls from a research on diabetes in BGI-Shenzhen.

3. In this step, NS/SS/Indel variants identified in the control WES data were excluded from the gene list.

4. In this step, we removed 4 known disease-causing genes because the clinical symptoms associated with them did not match the phenotype of family A.

5. In this step, we removed 13 variants because they are not co-segregated with disease status.

**Supplementary Table S4. Variants of known non-dementia associated pathogenic genes.**

| Gene  | Position <sup>a</sup> | RefSeq         | Mutation type | cDNA change  | Protein change | Phenotype                               | Inheritance | OMIM   |
|-------|-----------------------|----------------|---------------|--------------|----------------|-----------------------------------------|-------------|--------|
| CUBN  | 16877124              | NM_001081.3    | hete          | c.10251T>A   | N3417K         | Megaloblastic anemia-1                  | AR          | 602997 |
| CEP57 | 95561049              | NM_001243776.1 | hete          | c.958A>G     | S320G          | Mosaic variegated aneuploidy syndrome 2 | AR          | 607951 |
| TBP   | 170871055             | NM_003194.4    | hete          | c.231_264del | Q77fs          | Spinocerebellar ataxia 17               | AD          | 600075 |
| FLT4  | 180057281             | NM_002020.4    | hete          | c.457G>A     | A153T          | Lymphatic malformation-1                | AD          | 136352 |

**Supplementary Table S5. Identification of the candidate variants for Family A by exome sequencing.**

| Gene         | Chr         | Position <sup>a</sup> | RefSeq                | cDNA change        | Protein change | Mutation type | REVE score  | SIFT     | Polyphen2 | Mutation Taster |
|--------------|-------------|-----------------------|-----------------------|--------------------|----------------|---------------|-------------|----------|-----------|-----------------|
| <b>ECE-2</b> | <b>chr3</b> | <b>183995194</b>      | <b>NM_001100120.1</b> | <b>c.556C&gt;T</b> | <b>R186C</b>   | <b>hete</b>   | <b>0.89</b> | <b>D</b> | <b>D</b>  | <b>D</b>        |
| YEATS2       | chr3        | 183470023             | NM_018023.4           | c.1132G>A          | D378N          | hete          | 0.114       | D        | P         | N               |
| APEH         | chr3        | 49718618              | NM_001640.3           | c.1384C>T          | H462Y          | hete          | 0.082       | D        | B         | N               |

<sup>a</sup>. According to Human Feb. 2009 (GRCh37/hg19) Assembly;

RefSeq, NCBI reference sequences;

PolyPhen-2 (Polymorphism Phenotyping v2; <http://genetics.bwh.harvard.edu/pph/>);

SIFT (Sorting Intolerant from Tolerant; <http://sift.jcvi.org/>);

MutationTaster (<http://www.mutationtaster.org/>);

ReVe, a pathogenicity-computation method combining both REVEL and VEST3.

In this table, genes are ranked according Reve score.

**Supplementary Table S6. Damaging variants of ECE-2 gene predicted by ReVe in the Chinese cohort.**

| Refseq         | Location                    | Variant | Protein change | AD cases(n)                                | Controls (n) | ReVe value |
|----------------|-----------------------------|---------|----------------|--------------------------------------------|--------------|------------|
| ECE-2          | 183995194                   | C556T   | R186C          | 1                                          | 0            | 0.89       |
| NM_001100120.1 | 183995814                   | C718A   | P240T          | 1                                          | 0            | 0.952      |
|                | 184001651                   | A1033G  | M345V          | 1                                          | 0            | 0.833      |
|                | 184002848                   | A1241T  | D414V          | 1                                          | 0            | 0.815      |
|                | 184007304                   | G1592A  | R531H          | 1                                          | 0            | 0.779      |
|                | 184007449                   | G1632T  | M544I          | 2                                          | 0            | 0.876      |
|                | 184008118                   | C1765G  | Q589E          | 1                                          | 0            | 0.76       |
|                | 184008386                   | C1835A  | P612Q          | 1                                          | 0            | 0.931      |
|                | 184008858                   | G2003A  | R668Q          | 2                                          | 0            | 0.882      |
|                | 184009220                   | T2252C  | F751S          | 2                                          | 1            | 0.97       |
|                | Carriers/non-carriers (n/n) |         |                |                                            | 13/741       | 1/545      |
| Frequency (%)  |                             |         |                | 1.75%                                      | 0.18%        |            |
| SKAT-O         |                             |         |                | p=0.01; odds ratio=9.71, 95% CI=1.27-74.48 |              |            |

Variants with ReVe value over 0.7 are classified as damaging variants.

## Supplementary Figures

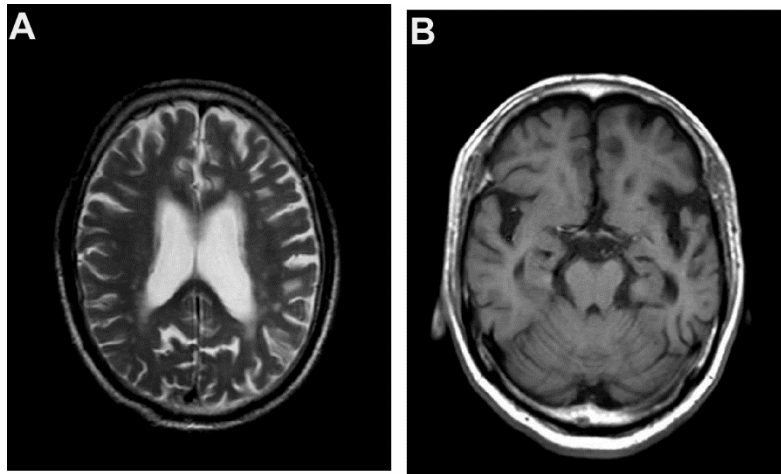

**Figure S1. Structural magnetic resonance images of patient III:5 in family A.** Axial T2-weighted MRI (A) and axial T1-weighted MRI (B) showed lacunar stroke and medial temporal lobe atrophy.

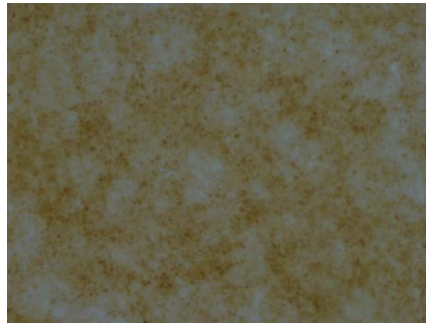

**Figure S2. Immunohistochemical analysis of aSyn pathology.** aSyn (LB509) immunostaining in the right temporal cortex region of patient III:3 in Family A.

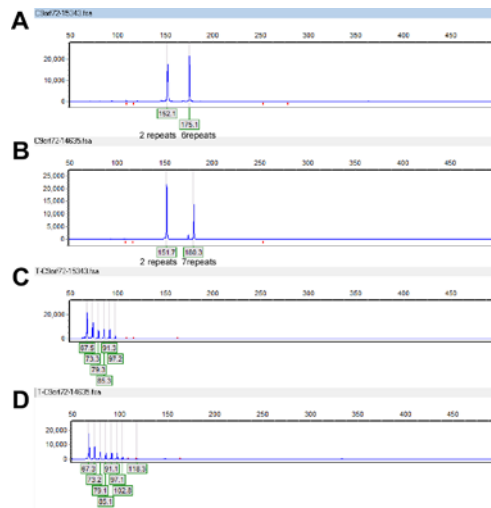

**Figure S3. Detection of GGGGCC hexanucleotide expansion in noncoding region of C9ORF72 in Family A.** Because pathogenic nucleotide repeat expansion cannot be detected by WES, we screened the presence of the GGGGCC hexanucleotide expansion in noncoding region of C9ORF72 of the proband (III:3, DNA NO. 15343) and patient III:5 (DNA NO. 14635) in Family A. Firstly, a two-step polymerase chain reaction protocol was adopted. In the first step, we used a polymerase chain reaction assay to detect the size of the expanded alleles. Briefly, DNA samples (50 ng/ $\mu$ l) were amplified using two primers (C9orf72-F: 5 FAM-CCTGTAGCAAGCTCTGGAAGCTC; C9orf72-R: 5 TCACTCACCCACTCGCCAC), and the primers ratio (1 $\mu$ l of 5 $\mu$ M C9orf72-F; 1 $\mu$ l of 5 $\mu$ M of C9orf72-R) were modified to improve the efficiency of the PCR. Other components of the PCR reaction included the following: 1 $\mu$ l of 50ng/ $\mu$ l of DNA samples, 0.15 $\mu$ l of KOD FX (Toyobo), 0.35 $\mu$ l of 100% DMSO, 0.4 $\mu$ l of 2nM dNTP, 4 $\mu$ l of 2xPCR buffer KOD FX(Toyobo), and 0.9 $\mu$ l ddH<sub>2</sub>O. The total process was performed using a touchdown thermocycling program. The reaction conditions consisted of 95 $^{\circ}$ C for 5 min, 5 cycles of 94 $^{\circ}$ C for 30sec, 67 $^{\circ}$ C for 30sec, with a decrement of 1 $^{\circ}$ C per cycle, 72 $^{\circ}$ C for 3 min, followed by 30cycles of 94 $^{\circ}$ C for 30sec, 62 $^{\circ}$ C for 30sec, 72 $^{\circ}$ C for 30sec, 72 $^{\circ}$ C for 3min, the final temperature was then sustained at 4 $^{\circ}$ C. In the second step, we performed a classical FAM-fluorescent labeled PCR assay to accurately measure the repeat sizes. The fragment length analysis was performed on an ABI 3730x1 DNA analyzer and was visualized by the GeneMarker software version 2.2.0. Secondly, repeat-primed PCR (RP-PCR) was performed to ascertain whether there were greater than 100 repeats present. In conclusion, pathogenic GGGGCC repeat expansion in C9orf72 were excluded from the two patients in Family A. (A-B) Capillary electrophoresis traces following flanking PCR, showing relatively balanced amplification of (A) 2 and 7 repeat alleles and (B) 2 and 6 repeat alleles. (C-D) The electropherograms of the polymerase chain reaction (PCR) products of RP-PCR reactions investigating the hexanucleotide repeat expansion in C9ORF72 of Patient III:3(C) and patient III:5(D).



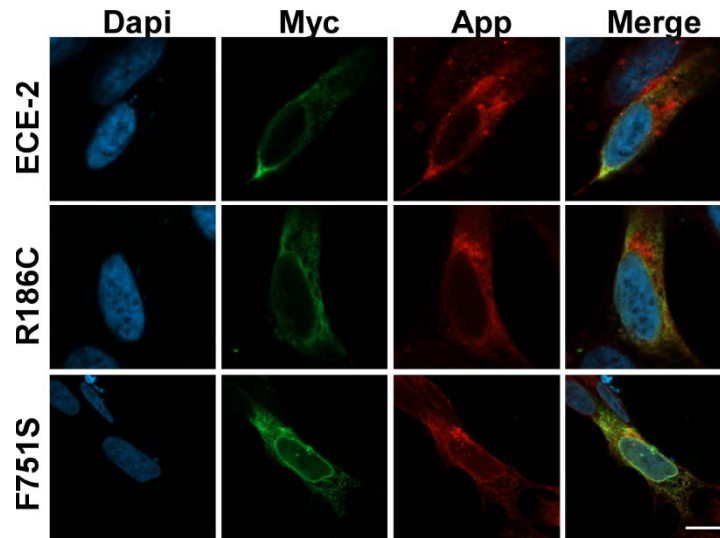

**Figure S4. Co-localization of ECE-2 wildtype, ECE-2 R186C and ECE-2 F751S with APP.** SH-SY5Y-APP cells were transfected with ECE-2 WT, ECE-2 R186C and ECE-2 F751S and immune-stained with the 9E10 antibody for ECE2 wildtype or mutants, and C20 antibody against the last 20 amino acids of APP C-terminus. Scale bar represents 10  $\mu$ m.

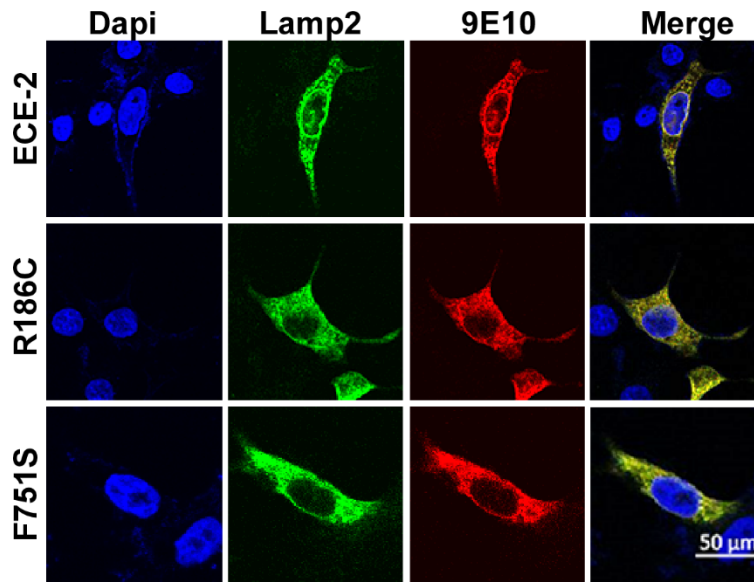

**Figure S5. Intracellular distribution of ECE-2 WT, ECE-2 R186C and ECE-2 F751S.** Cos7 cells were transfected with either pcDNA4/Myc-HisA-ECE-2-WT, pcDNA4/Myc-HisA-ECE-2-R186C or pcDNA4/Myc-HisA-ECE-2-F751S constructs and immuno-stained with anti-Myc antibody for ECE-2 wild type and mutant proteins and lamp-2 antibody for marker of lysosome. Scale bar represents 50  $\mu\text{m}$ .
